# Supplementary material for: Rare isolation of human-tropic recombinant porcine endogenous retroviruses PERV-A/C from Göttingen minipigs
Source: Springer Nature journal article supplement (doi:10.1186/s12985-022-01742-0), 2022-02-21
Supplement: MOESM1 [file 20151928]

|                      |                                                                         |     |
|----------------------|-------------------------------------------------------------------------|-----|
|                      | 1                                                                       | 60  |
| PERV A (AJ293656.1): | CCTACCAGTTATAATCAATTTAATTATGGCCATGGGAGATGGAAAGATTGGCAACAGCGG            |     |
| PERV C (KY352351):   | TATACCAGCTCTGGACAATTTAATTA --- CC --- TGACCTGGA ---- TTAG-AACTG ---     |     |
| PERV A/C (GöMP-F):   | CCTACCAGTTATAATCAATTTAATTATGGCCATGGGAGATGGAAAGATTGGCANCAGCGG            |     |
| PERV A/C (GöMP-8):   | CCTACCAGTTATAATCAATTTAATTATGGCCATGGGAGATGGAAAGATTGGCAACAGCGG            |     |
|                      | 61                                                                      | 120 |
| PERV A (AJ293656.1): | GTACAAAAAGATGTACGAAATAAGCAAATAAGCTGTCATTGTTAGACCTAGATTACTTA             |     |
| PERV C (KY352351):   | ----- GAAGCCC ----- CAAGT -- GCTCTCCTC --- AGACCTAGATTACCTA             |     |
| PERV A/C (GöMP-F):   | GTACAAAAAGATGTACGAAATAAGCAAATAAGCTGTCATTGTTAGACCTAGATTACTTA             |     |
| PERV A/C (GöMP-8):   | GTACAAAAAGATGTACGAAATAAGCAAATAAGCTGTCATTGTTAGACCTAGATTACTTA             |     |
|                      | 121                                                                     | 180 |
| PERV A (AJ293656.1): | AAAATAAGTTTCACTGAAAAAGGAAAAACAAGAAAATATTCAAAAAGTGGGTAAATGGTATA          |     |
| PERV C (KY352351):   | AAAATAAGTTTCACTGAGAAAGGAAAAACAAGAAAATATCCTAAAATGGGTAAATGGTATG           |     |
| PERV A/C (GöMP-F):   | AAAATAAGTTTCACTGAAAAAGGAAAAACAAGAAAATATTCAAAAAGTGGGTAAATGGTATG          |     |
| PERV A/C (GöMP-8):   | AAAATAAGTTTCACTGAAAAAGGAAAAACAAGAAAATATTCAAAAAGTGGGTAAATGGTATG          |     |
|                      | 181                                                                     | 240 |
| PERV A (AJ293656.1): | TCTTGGGGAATAGTGTACTATGGAGGCTCTGGGAGAAAGAAAGGATCTGTTCTGACTATT            |     |
| PERV C (KY352351):   | TCTTGGGGAATGGTATATTATGGAGGCTCGGGTAAACAACAGGCTCCATTCTAECTATT             |     |
| PERV A/C (GöMP-F):   | TCTTGGGGAATAGTGTACTATGGAGGCTCTGGGAGAAAGAAAGGATCTGTTCTGACTATT            |     |
| PERV A/C (GöMP-8):   | TCTTGGGGAATAGTGTACTATGGAGGCTCTGGGAGAAAGAAAGGATCTGTTCTGACTATT            |     |
|                      | 241                                                                     | 300 |
| PERV A (AJ293656.1): | CGCCTCAGAATAGAAACTCAGATGGAACCTCCGTTGCTATAGGACCAATAAGGGTTTG              |     |
| PERV C (KY352351):   | CGCCTCAAAATA -- AAC - CAGCTGGAGCCTCCAATGGCTATAGGACCAATACGGTCTTG         |     |
| PERV A/C (GöMP-F):   | CGCCTCAAAATAGAAACTCAGCTGGAGCCTCCAATGGCTATAGGACCAATACGGTCTTG             |     |
| PERV A/C (GöMP-8):   | CGCCTCAGAATAGAAACTCAGATGGAACCTCCGTTGCTATAGGACCAATAAGGGTTTG              |     |
|                      | 301                                                                     | 360 |
| PERV A (AJ293656.1): | GCCGAACAAGGACCTCCAATCCAAGAACAGAGGCCATCTCTAACCCCTCTGATTACAAT             |     |
| PERV C (KY352351):   | ACGGGTCAAAGACCCCAACCCAAGGACCAGGACCAT ----- CCTCT ----- AAC              |     |
| PERV A/C (GöMP-F):   | ACGGGTCAAAGACCCCAACCCAAGGACCAGGACCATCTCTAACCCCTCTGATTACAAT              |     |
| PERV A/C (GöMP-8):   | GCCGAACAAGGACCTCCAATCCAAGAACAGAGGCCATCTCTAACCCCTCTGATTACAAT             |     |
|                      | 361                                                                     | 420 |
| PERV A (AJ293656.1): | ACAACCTCTGGATCAGTCCCCACTGAGCCTAACATCACTATTA AAAACA - GGGGCGAAACT        |     |
| PERV C (KY352351):   | ATAACTTCTGGATCAGACCCCACTGAGTCTAACAGCAGCACTAAAAT - GGGGCGAAACT           |     |
| PERV A/C (GöMP-F):   | ATAWCCTCTGGATCAGTCCCCACTGAGCCTAACATCACTATTA AAAACAGGGGCGAAACT           |     |
| PERV A/C (GöMP-8):   | ACAACCTCTGGATCAGTCCCCACTGAGCCTAACATCACTATTA AAAACA - GGGGCGAAACT        |     |
|                      | 421                                                                     | 480 |
| PERV A (AJ293656.1): | TTTTAGCCTCATCCAGGGAGCTTTTCAAGCTCTTAACCTCCAGACTCCAGAGGCTACCTC            |     |
| PERV C (KY352351):   | TTTTAGCCTCATCCAGGGAGCTTTTCAAGCTCTTAACCTCCAGACTCCAGAGGCTACCTC            |     |
| PERV A/C (GöMP-F):   | TTTTAGCCTCATCCAGGGAGCTTTTCAAGCTCTTAACCTCCAGACTCCAGAGGCTACCTC            |     |
| PERV A/C (GöMP-8):   | TTTTAACCTCATCCAGGGAGCTTTTCAAGCTCTTAACCTCCAGACTCCAGAGGCTACCTC            |     |
|                      | 481                                                                     | 540 |
| PERV A (AJ293656.1): | TTCTTGTGGCTTTGCTTAGCTTCGGGCCACCTTACTATGAGGGAATGGCTAGAGGAGG              |     |
| PERV C (KY352351):   | TTCTTGTGGCTATGCTTAGCTTTGGGCCACCTTACTATGAAGGAATGGCTAGAGGAGG              |     |
| PERV A/C (GöMP-F):   | TTCTTGTGGCTTTGCTTAGCTTCGGGCCACCTTACTATGAGGGAATGGCTAGAGGAGG              |     |
| PERV A/C (GöMP-8):   | TTCTTGTGGCTTTGCTTAGCTTCGGGCCACCTTACTATGAGGGAATGGCTAGAGGAGG              |     |
|                      | 541                                                                     | 600 |
| PERV A (AJ293656.1): | GAAATTC AATGTGACAAAAGGAACATAGAGACCAATGTACATGGGGATCCCAAATAAGCT           |     |
| PERV C (KY352351):   | GAAATTC AATGTGACAAAAGGAACATAGAGACCAATGCACATGGGGATCCCAAATAAGCT           |     |
| PERV A/C (GöMP-F):   | GAAATTC AATGTGACAAAAGGAACATAGAGACCAATGTACATGGGGATCCCAAATAAGCT           |     |
| PERV A/C (GöMP-8):   | GAAATTC AATGTGACAAAAGGAACATAGAGACCAATGTACATGGGGATCCCAAATAAGCT           |     |
|                      | 601                                                                     | 660 |
| PERV A (AJ293656.1): | TACCCTTACTGAGGTTTCTGGAAAAGGCACCTGCATAGGGATGGTTC C C C C C T C C C C C A |     |
| PERV C (KY352351):   | TACCCTTACTGAGGTTTCTGGAAAAGGCACCTGCATAGGAAAGGTT C C C C C T C C C C C A  |     |
| PERV A/C (GöMP-F):   | TACCCTTACTGAGGTTTCTGGAAAAGGCACCTGCATAGGAAAGGTT C C C C C T C C C C C A  |     |
| PERV A/C (GöMP-8):   | TACCCTTACTGAGGTTTCTGGAAAAGGCACCTGCATAGGGATGGTTC C C C C C T C C C C C A |     |

661 720  
 PERV A (AJ293656.1): ACACCTTTGTAACCACACTGAAGCCTTTAATCGAACCTCTGAGAGTCAATATCTGGTACC  
 PERV C (KY352351): ACACCTTTGTAACCACACTGAAGCCTTTAATCAAACCTCTGAGAGTCAATATCTGGTACC  
 PERV A/C (GöMP-F): ACACCTTTGTAACCACACTGAAGCCTTTAATCGAACCTCTGAGAGTCAATATCTGGTACC  
 PERV A/C (GöMP-8): ACACCTTTGTAACCACACTGAAGCCTTTAATCGAACCTCTGAGAGTCAATATCTGGTACC

721 780  
 PERV A (AJ293656.1): TGGTTATGACAGGTGGTGGGCATGTAATACTGGATTAACCCCTTGTGTTCCACCTTGGT  
 PERV C (KY352351): TGGTTATGACAGGTGGTGGGCATGTAATACTGGATTAACCCCTTGTGTTCCACCTTGGT  
 PERV A/C (GöMP-F): TGGTTATGACAGGTGGTGGGCATGTAATACTGGATTAACCCCTTGTGTTCCACCTTGGT  
 PERV A/C (GöMP-8): TGGTTATGACAGGTGGTGGGCATGTAATACTGGATTAACCCCTTGTGTTCCACCTTGGT

781 840  
 PERV A (AJ293656.1): TTTCACCAAATAAGACTTTTGCCTTATGGTCCAAATTGTCCCCGGGTGTAATACTA  
 PERV C (KY352351): TTTCACCAAATAAGACTTTTGCCTTATGGTCCAAATTGTCCCCGAGTGTATACTA  
 PERV A/C (GöMP-F): TTTCACCAAATAAGACTTTTGCCTTATGGTCCAAATTGTCCCCGAGTGTATACTA  
 PERV A/C (GöMP-8): TTTCACCAAATAAGACTTTTGCCTTATGGTCCAAATTGTCCCCGGGTGTAATACTA

841 900  
 PERV A (AJ293656.1): TCCCGAAAAAGCAGTCCTTGATGAATATGACTATAGATATAATCGGCCAAAAAGAGAGCC  
 PERV C (KY352351): TCCCGAAAAAGCAATCCTTGATGAATATGACTACAGAAATCATCGACAAAAGAGAGAACC  
 PERV A/C (GöMP-F): TCCCGAAAAAGCAATCCTTGATGAATATGACTACAGAAATCATCGACAAAAGAGAGAACC  
 PERV A/C (GöMP-8): TCCCGAAAAAGCAGTCCTTGATGAATATGACTATAGATATAATCGGCCAAAAAGAGAGCC

901 960  
 PERV A (AJ293656.1): CATATCCCTGACACTAGCTGTAATGCTCGGATTGGGAGTGGCTGCAGGCGTGGGAACAGG  
 PERV C (KY352351): CATATCTCTGACACTTGTCTGTATGCTCGGACTTGGAGTGGCAGCAGGTGTAGGAACAGG  
 PERV A/C (GöMP-F): CATATCTCTGACACTTGTCTGTATGCTCGGACTTGGAGTGGCAGCAGGTGTAGGAACAGG  
 PERV A/C (GöMP-8): CATATCCCTGACACTAGCTGTAATGCTCGGATTGGGAGTGGCTGCAGGCGTGGGAACAGG

961 1020  
 PERV A (AJ293656.1): AACGGCTGCCCTAATCACAGGACCGCAACAGCTGGAGAAAGGACTTAGTAACCTACATCG  
 PERV C (KY352351): AACAGCTGCCCTGTGACGGGACCGCAACAGCTAGAAACAGGACTTAGTAACCTACATCG  
 PERV A/C (GöMP-F): AACAGCTGCCCTGTGACGGGACCGCAACAGCTAGAAACAGGACTTAGTAACCTACATCG  
 PERV A/C (GöMP-8): AACGGCTGCCCTAATCACAGGACCGCAACAGCTGGAGAAAGGACTTAGTAACCTACATCG

1021 1080  
 PERV A (AJ293656.1): AATTGTAACGGAAGATCTCCAAGCCCTAGAAAAATCTGTCAGTAACCTGGAGGAATCCCT  
 PERV C (KY352351): AATTGTAACGGAAGATCTCCAAGCCCTAGAAAAATCTGTCAGTAACCTGGAGGAGTCCCT  
 PERV A/C (GöMP-F): AATTGTAACGGAAGATCTCCAAGCCCTAGAAAAATCTGTCAGTAACCTGGAGGAATCCCT  
 PERV A/C (GöMP-8): AATTGTAACGGAAGATCTCCAAGCCCTAGAAAAATCTGTCAGTAACCTGGAGGAATCCCT

1081 1140  
 PERV A (AJ293656.1): AACCTCCTTATCTGAAGTGGTTCTACAGAACAGAAAGGGGTTAGATCTGTTATTTCTAAA  
 PERV C (KY352351): AACCTCCTTATCTGAGGTAGTCTACAGAAAGAGGGTTAGATTTATTTCTAAA  
 PERV A/C (GöMP-F): AACCTCCTTATCTGAAGTGGTTCTACAGAACAGAAAGGGGTTAGATTTATTTCTAAA  
 PERV A/C (GöMP-8): AACCTCCTTATCTGAAGTGGTTCTACAGAACAGAAAGGGGTTAGATCTGTTATTTCTAAA

1141 1200  
 PERV A (AJ293656.1): AGAAGGAGGGTTATGTGTAGCCTTAAAAGAGGAATGCTGCTTTTATGTGGATCATTGAGG  
 PERV C (KY352351): AGAAGGAGGATTATGTGTAGCCTTGAAGGAGGAATGCTGTTTTTATGTGGATCATTGAGG  
 PERV A/C (GöMP-F): AGAAGGAGGATTATGTGTAGCCTTGAAGGAGGAATGCTGTTTTTATGTGGATCATTGAGG  
 PERV A/C (GöMP-8): AGAAGGAGGGTTATGTGTAGCCTTAAAAGAGGAATGCTGCTTTTATGTGGATCATTGAGG

1201 1260  
 PERV A (AJ293656.1): AGCTATCAGGGACTCCATGAGCAAGCTCAGAGAAAGGTTAGAAAAACGTCACAAAGAAAA  
 PERV C (KY352351): GGCCATCAGAGACTCCATGAACAAGCTTAGAGAAAGGTTGGAGAAGCGTCGAAGGGAAAA  
 PERV A/C (GöMP-F): GGCCATCAGAGACTCCATGAACAAGCTTAGAGAAA  
 PERV A/C (GöMP-8): AGCTATCAGGGACTCCATGAGCAAGCTCAGAGAAAGGTT**GGAGAAGCGTCGAAGGGAAAA**

1261  
 PERV A (AJ293656.1): AGAGGCTGGCCAAGGATGTTTGAGG  
 PERV C (KY352351): GGAAACTACTCAAGGGTGGTTTGAGG  
 PERV A/C (GöMP-F):  
 PERV A/C (GöMP-8): **GGAAACTACTCAAGGGTGGTT - GAG -**
